# Supplementary material for: A Composite Membrane System with Gold Nanoparticles, Hydroxyapatite, and Fullerenol for Dual Interaction for Biomedical Purposes
Source: MDPI journal article supplement (doi:10.3390/membranes11080565), 2021-07-27
Supplement: s1 [file s1]

# Supplementary Materials: A Composite Membrane System with Gold Nanoparticles, Hydroxyapatite, and Fullerenol for Dual Interaction for Biomedical Purposes

Anna Grzeczkwicz <sup>1</sup>, Monika Drabik <sup>1</sup>, Agata Lipko <sup>1</sup>, Paweł Bącal <sup>1,2</sup>, Angelika Kwiatkowska <sup>1</sup>, Beata Kazimierczak <sup>1</sup> and Ludomira H. Granicka <sup>1,\*</sup>

<sup>1</sup> Nalecz Institute of Biocybernetics and Biomedical Engineering, Polish Academy of Sciences, Trojdena 4 st., 02-109 Warsaw, Poland; agrzeczkwicz@ibib.waw.pl (A.G.); mdrabik@ibib.waw.pl (M.D.); alipko@ibib.waw.pl (A.L.); pbacal@ibib.waw.pl (P.B.); ankwiatkowska@op.pl (A.K.); bkazimierczak@ibib.waw.pl (B.K.)

<sup>2</sup> Institute of Paleobiology, Polish Academy of Sciences, Twarda 51/55 st, 02-109 Warsaw, Poland

\* Correspondence: lgranicka@ibib.waw.pl; Tel.: +48-22-592-59-00

## *Preparation of Multilayered Films*

**Procedure:** Conjugation of gold nanoparticles to FITC

1. Fluorescein isothiocyanate (FITC) was dissolved in acetone at a concentration of 1 mg/mL.
2. The FITC solution was added to the suspension of gold nanoparticles (160 ppm) by volume
  1. 10  $\mu$ L per 1 mL of gold nanoparticle suspension.
  2. Tubes with a mixture of gold nanoparticles and FITC were left overnight at 4 °C.
  3. To confirm the FITC presence, the absorbance of the samples (Au-FITC) was measured at a wavelength of  $\lambda = 450$  nm using a Multiskan FC photometer (Thermo Fisher Scientific).

**Schema:** The illustration presenting the composition of studied membranes.

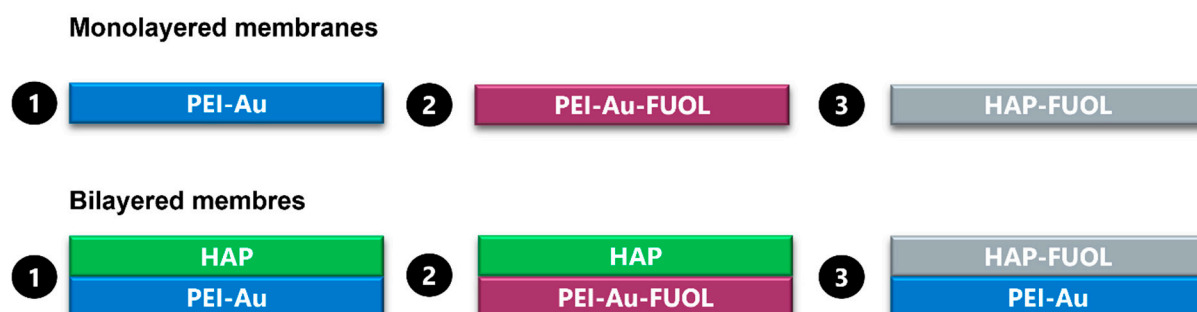

**Schema S1.** The illustration showing the composition of studied films.

## Scanning Electron Microscopy Analysis

The morphology of cells immobilized within the developed membranes was examined using scanning electron microscopy (SEM). Wherein the cells grown directly on a slide without membranes served as control. The images of the systems after 3- and 10-days of culture are shown in Figures S1, S2.

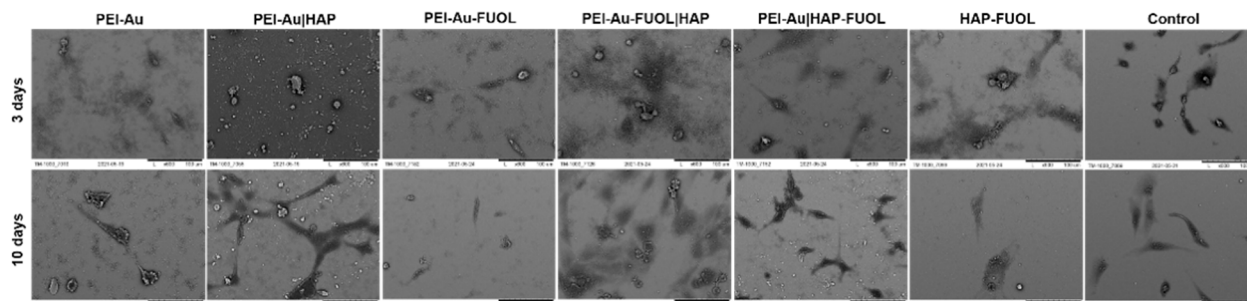

**Figure S1.** SEM visualization of hFOB cells immobilized within designed scaffolds after 3- or 10-day culture. As a control, served cells cultured on glass slides without the membranes. Key to the symbols: PEI-Au: the membrane build of the polyethylenimine with AuNPs incorporating; PEI-Au|HAP: bilayer consisting of polyethylenimine with AuNPs incorporating and hydroxyapatite; PEI-Au-FUOL: polyethylenimine with AgNPs and FUOL incorporating; PEI-Au-FUOL|HAP bilayer consisting of polyethylenimine with AuNPs and FUOL incorporating and hydroxyapatite; PEI-Au|HAP-FUOL bilayer consisting of polyethylenimine with AuNPs incorporating and hydroxyapatite with FUOL incorporating; HAP-FUOL: hydroxyapatite with FUOL incorporating.

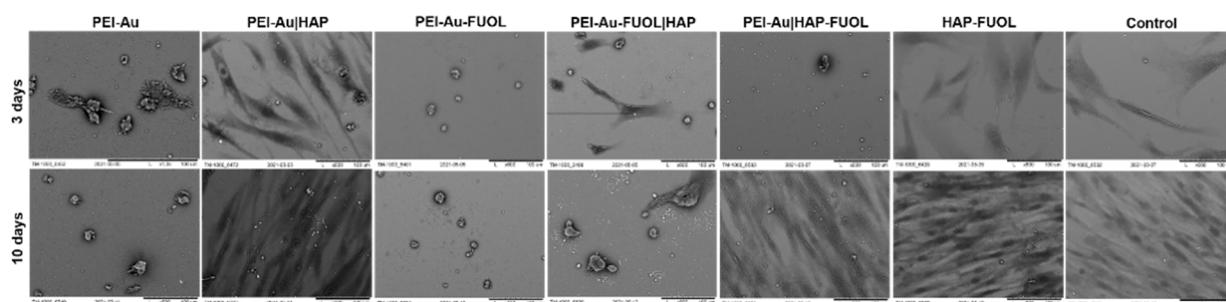

**Figure S2.** SEM visualization of HDF cells immobilized within designed scaffolds after 3- or 10-day culture. As a control, served cells cultured on glass slides without the membranes. Key to the symbols: PEI-Au: the membrane build of the polyethylenimine with AuNPs incorporating; PEI-Au|HAP: bilayer consisting of polyethylenimine with AuNPs incorporating and hydroxyapatite; PEI-Au-FUOL: polyethylenimine with AgNPs and FUOL incorporating; PEI-Au-FUOL|HAP bilayer consisting of polyethylenimine with AuNPs and FUOL incorporating and hydroxyapatite; PEI-Au|HAP-FUOL bilayer consisting of polyethylenimine with AuNPs incorporating and hydroxyapatite with FUOL incorporating; HAP-FUOL: hydroxyapatite with FUOL incorporating.
